# Supplementary material for: Metabolic disturbances in synovial fluid are involved in the onset of synovitis in heifers with acute ruminal acidosis
Source: PubMed Central journal article supplement (PMC6443794; doi:10.1038/s41598-019-42007-1), 2019-04-01

**Metabolic disturbances in synovial fluid are involved in the onset of synovitis in heifers with acute ruminal acidosis.**

Pablo Alarcon<sup>1</sup>, Alejandra A Hidalgo<sup>1</sup>, Carolina Manosalva<sup>2</sup>, Raul Cristi<sup>1</sup>, Stefanie Teuber<sup>1</sup>, Maria A Hidalgo<sup>1</sup>, Rafael A Burgos<sup>1</sup> \*.

<sup>1</sup>Laboratory of Inflammation Pharmacology, Faculty of Veterinary Science, Institute of Pharmacology and Morphophysiology, Universidad Austral de Chile, Valdivia, Chile

<sup>2</sup>Faculty of Sciences, Institute of Pharmacy, Universidad Austral de Chile, Valdivia, Chile

\*Correspondence to:

Rafael A Burgos: rburgos1@uach.cl

Supplementary table S1. Retention time, retention index, quant mass, metabolite name, and total similarity of the compounds detected by GC-MS of synovial fluid before ARA induction.

Supplementary fig S1. Partial least square-discriminant analysis (A) and the greatest variable importance in projection scores (B) of metabolites of synovial fluid from heifers with ARA are shown.

Supplementary fig S1

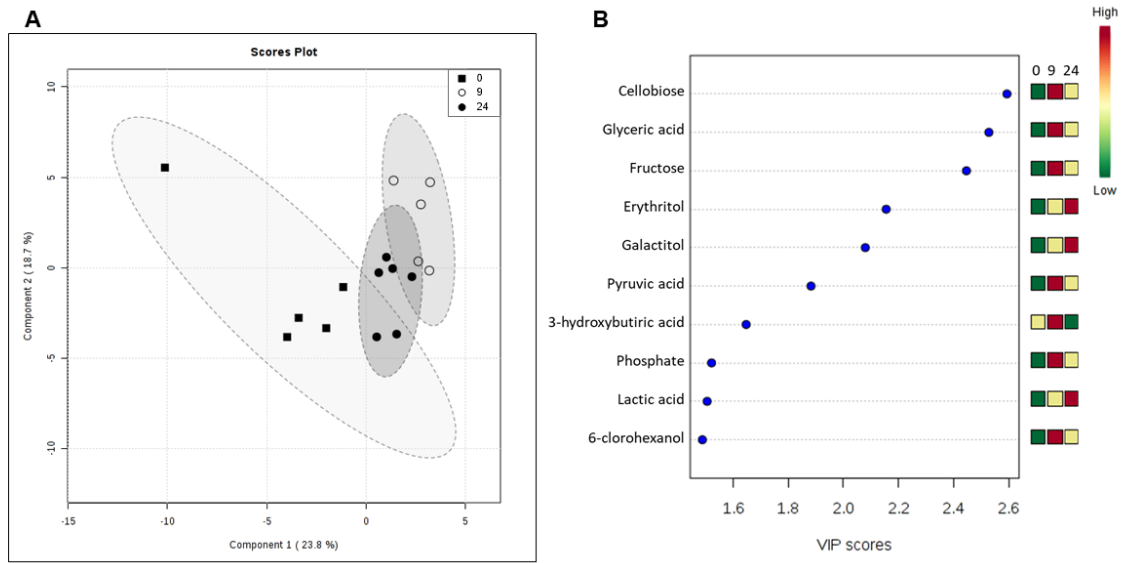

Supplement: 41598_2019_42007_MOESM1_ESM.pdf [file 41598_2019_42007_MOESM1_ESM.pdf]
